# Supplementary material
Source: PubMed Central journal article supplement (PMC6215516)
Supplement: NIHMS1506641-supplement-1.pdf [file NIHMS1506641-supplement-1.pdf]

**A.**

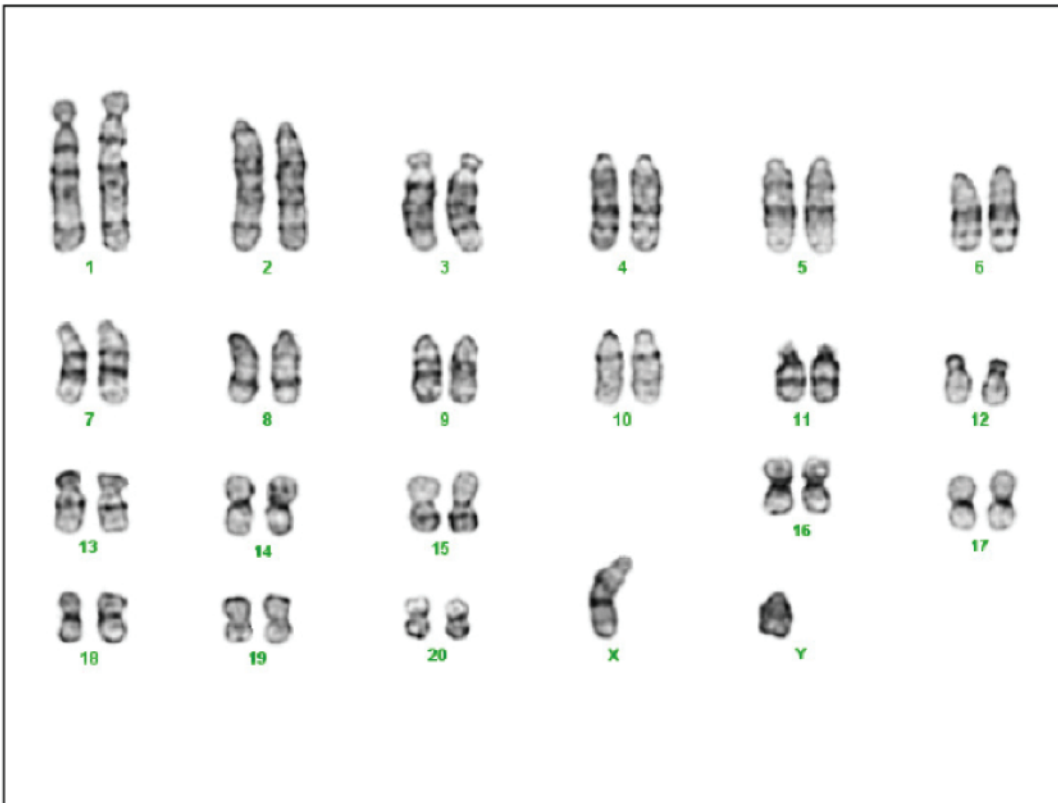

**B.**

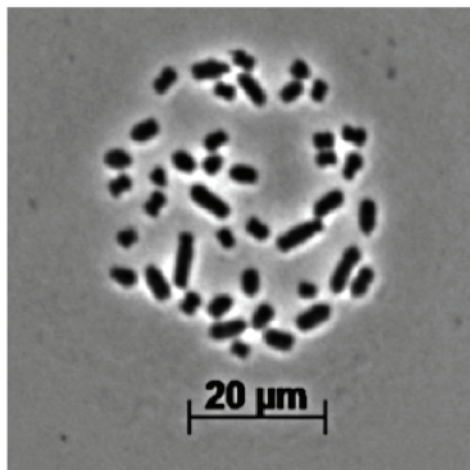

Fig. S1. A and B, Karyotype analysis for Spermatogonia at passage 16, before transfection with XTNs demonstrating a normal male 40, XY karyotype.
