# Supplementary material
Source: PubMed Central journal article supplement (PMC6215516)
Supplement: NIHMS1506641-supplement-2.pdf [file NIHMS1506641-supplement-2.pdf]

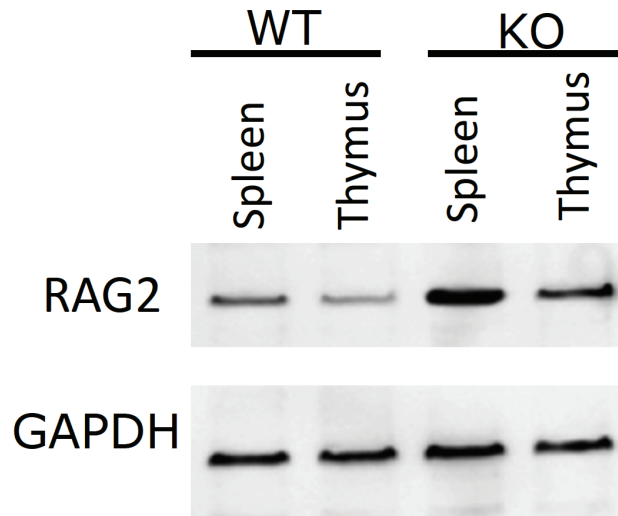

Fig. S2. Western Blot analysis for RAG2 protein expression in SDR rats. Rat thymus and spleen lysates were loaded onto a 7.5% SDS-PAGE gel and probed with a RAG2 polyclonal antibody at a dilution of 1:1000.
