# Supplementary material
Source: PubMed Central journal article supplement (PMC6215516)
Supplement: NIHMS1506641-supplement-3.pdf [file NIHMS1506641-supplement-3.pdf]

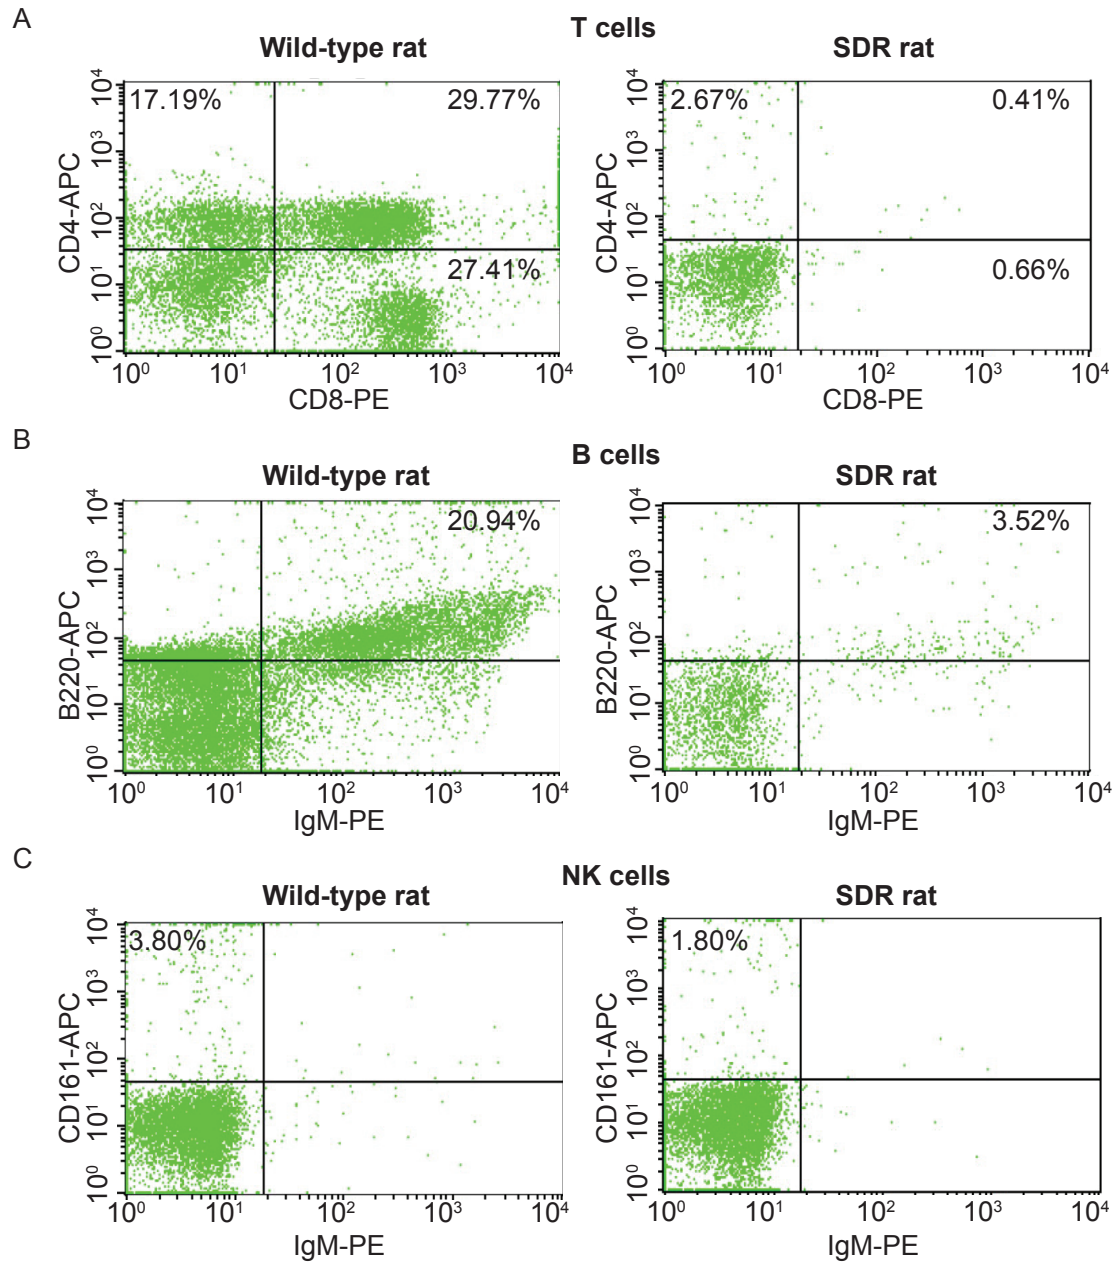

Fig. S3. Immunophenotyping of the SDR rat. Analysis of SDR whole blood demonstrates greatly diminished T and B cells compared to the wild-type rat. A, The wild-type rat has a significant population of circulating CD4<sup>+</sup>, CD8<sup>+</sup>, and CD4/CD8 double positive T cell populations compared to the SDR rat. B, The wild-type rat has over 20% B220/IgM double positive mature B cells, compared to 3.5% in the SDR rat. C, The SDR rat has slightly less circulating NK cells, unlike what is observed in the spleen. Panels are representative of 3 wild-type and 3 SDR rats. Left panels: wild-type rat. Right panels: SDR rat.
