# Supplementary material
Source: PubMed Central journal article supplement (PMC6215516)
Supplement: NIHMS1506641-supplement-4.pdf [file NIHMS1506641-supplement-4.pdf]

Supplementary Table S1. ANOVA with multiple comparisons and Tukey's post-hoc test

| Tukey's multiple comparisons test                                          | Difference between the means (tumor volume (mm <sup>3</sup> )) | 95% CI of diff. | P-value Summary | Adjusted P Value |
|----------------------------------------------------------------------------|----------------------------------------------------------------|-----------------|-----------------|------------------|
| H358 1 million cells Rag2 -/- rats vs. H358 5 million cells Rag2 -/- rats  | -1386                                                          | -2749 to -23.64 | *               | 0.0444           |
| H358 1 million cells Rag2 -/- rats vs. H358 10 million cells Rag2 -/- rats | -2473                                                          | -3766 to -1181  | ****            | < 0.0001         |
| H358 1 million cells Rag2 -/- rats vs. H358 10 million cells NSG mice      | 1298                                                           | 53.64 to 2541   | *               | 0.0372           |
| H358 1 million cells Rag2 -/- rats vs. H358 10 million cells Nude mice     | 1426                                                           | 182.4 to 2670   | *               | 0.0176           |
| H358 5 million cells Rag2 -/- rats vs. H358 10 million cells Rag2 -/- rats | -1087                                                          | -2380 to 205.5  | ns              | 0.1358           |
| H358 5 million cells Rag2 -/- rats vs. H358 10 million cells NSG mice      | 2684                                                           | 1440 to 3928    | ****            | < 0.0001         |
| H358 5 million cells Rag2 -/- rats vs. H358 10 million cells Nude mice     | 2812                                                           | 1569 to 4056    | ****            | < 0.0001         |
| H358 10 million cells Rag2 -/- rats vs. H358 10 million cells NSG mice     | 3771                                                           | 2604 to 4938    | ****            | < 0.0001         |
| H358 10 million cells Rag2 -/- rats vs. H358 10 million cells Nude mice    | 3900                                                           | 2733 to 5066    | ****            | < 0.0001         |
| H358 10 million cells NSG mice vs. H358 10 million cells Nude mice         | 128.8                                                          | -983.8 to 1241  | ns              | 0.9973           |
